# Supplementary material for: Role of NF-κB pathway in kidney renal clear cell carcinoma and its potential therapeutic implications
Source: Aging (Albany NY). 2023 Oct 16;15(20):11313–30. doi: 10.18632/aging.205129 (PMC10637793; doi:10.18632/aging.205129)
Supplement: Supplementary Table 1 [file aging-15-205129-s001.xlsx]

## Sheet: Sheet1
Supplementary Table 1. SNV frequencies of NF-κB gene families in 32 cancer types.
	ACC	BLCA	BRCA	CESC	CHOL	COAD	DLBC	ESCA	GBM	HNSC	KICH	KIRC	KIRP	LAML	LGG	LIHC	LUAD	LUSC	MESO	OV	PAAD	PCPG	PRAD	READ	SARC	SKCM	STAD	TGCT	THCA	THYM	UCEC	UCS	UVM
CHUK	0	0.0121359	0.00507099	0.0207612	0	0.0300752	0	0.0108696	0.00512821	0.0118577	0.0151515	0.00297619	0.00711744	0.00746269	0	0.0192308	0.0106952	0.01222	0	0.0114679	0.00632911	0	0	0.0147059	0	0.00856531	0.0115473	0	0.00205339	0	0.0567108	0	0
FADD	0.0217391	0.00970874	0	0.0138408	0	0.0125313	0	0	0	0.00197628	0	0.00297619	0	0.00746269	0	0.010989	0.00534759	0.00610998	0	0.00229358	0	0.00561798	0	0.00735294	0	0.00214133	0.00461894	0	0	0	0.020794	0	0
IKBKB	0.0108696	0.0364078	0.010142	0.0103806	0	0.0175439	0.0540541	0.0108696	0.0102564	0.0177866	0	0.00297619	0.00355872	0	0.00395257	0.0137363	0.0249554	0.0183299	0	0.00458716	0.0126582	0	0	0.0220588	0	0.0428266	0.0254042	0	0	0	0.0888469	0.0175439	0
IKBKG	0	0.00485437	0	0	0	0.00501253	0	0.0108696	0	0	0	0	0.00711744	0	0	0	0.00356506	0	0	0.00229358	0	0	0	0.00735294	0	0.00214133	0	0	0	0	0.0359168	0	0
IL1A	0	0.00242718	0	0.00692042	0	0.0100251	0	0.00543478	0.00512821	0.00197628	0	0	0.00355872	0	0	0	0.00534759	0.0101833	0	0.00229358	0	0	0.00206612	0	0.00421941	0.0235546	0.00923788	0	0	0	0.0132325	0.0175439	0
IL1R1	0	0.00242718	0.0030426	0.00346021	0	0.0175439	0	0.00543478	0.0102564	0.00790514	0	0.00297619	0	0	0.00197628	0.0137363	0.00534759	0.0162933	0	0	0	0	0.00206612	0.0147059	0.00843882	0.0599572	0.00692841	0	0.00205339	0	0.0623819	0	0.0125
MAP3K1	0.0217391	0.026699	0.0831643	0.0242215	0	0.0576441	0	0.048913	0.0205128	0.013834	0	0.00892857	0.0106762	0	0.00395257	0.010989	0.0106952	0.0285132	0	0.00688073	0.00632911	0	0.00206612	0.0220588	0	0.0192719	0.0230947	0	0.00205339	0.00819672	0.134216	0.0175439	0
MAP3K14	0.0217391	0.0121359	0.0020284	0.0415225	0.0196078	0.0426065	0	0.0163043	0.0025641	0.0158103	0	0.00297619	0.0106762	0.00746269	0.00395257	0.00549451	0.0160428	0.0101833	0	0.0137615	0.00632911	0	0.00206612	0.0147059	0.00421941	0.0449679	0.0184758	0	0	0	0.0548204	0	0
MAP3K7	0.0108696	0.0169903	0.00507099	0.0138408	0	0.0250627	0	0.0163043	0.00769231	0.0118577	0.0151515	0.00297619	0.00711744	0	0	0.0137363	0.0160428	0.0162933	0	0.00458716	0	0	0.00413223	0.0147059	0.00421941	0.0192719	0.0323326	0.00689655	0	0.00819672	0.0907372	0	0
MYD88	0	0.00728155	0.0030426	0.00346021	0	0.0175439	0.162162	0.0108696	0.00512821	0.00197628	0	0	0.00711744	0.00746269	0	0.010989	0.00534759	0.00203666	0.0125	0.00229358	0	0	0.00206612	0.00735294	0	0.012848	0.0184758	0	0	0	0.0283554	0.0175439	0
NFKB1	0.0108696	0.00970874	0.00608519	0.017301	0.0196078	0.0150376	0	0.0271739	0.0025641	0.00988142	0	0	0	0	0.00197628	0.010989	0.0196078	0.0244399	0	0.00688073	0.00632911	0.00561798	0.00206612	0.0441176	0.0126582	0.0256959	0.0115473	0	0	0	0.0869565	0.0175439	0
NFKBIA	0	0.00728155	0.0030426	0.0138408	0	0.0100251	0.135135	0.00543478	0.0025641	0.00395257	0	0	0.0106762	0	0.00197628	0.00824176	0.0124777	0.00203666	0.0125	0.00458716	0.00632911	0	0	0.0147059	0	0.00856531	0.0161663	0	0	0	0.0415879	0	0
RELA	0	0.0121359	0.0020284	0.0207612	0	0.0325815	0	0.00543478	0.0025641	0.00790514	0	0.00297619	0.0106762	0	0.00395257	0.0137363	0.00891266	0.00610998	0	0.00229358	0.00632911	0	0.00413223	0.00735294	0.0126582	0.0171306	0.0184758	0	0	0	0.0567108	0	0
RIPK1	0	0.0169903	0.00608519	0.0138408	0	0.0250627	0	0	0.0025641	0.00790514	0	0.00297619	0.00355872	0	0.00592885	0.010989	0.0178253	0.00610998	0	0	0	0	0.00619835	0	0.00843882	0.012848	0.00923788	0	0	0	0.0718336	0	0
TAB1	0.0217391	0.00970874	0.0010142	0.0103806	0	0.0225564	0	0.00543478	0.0025641	0.013834	0	0.00297619	0.00355872	0	0.00395257	0.00824176	0.0142602	0.0101833	0	0.00688073	0.00632911	0	0.00413223	0.00735294	0.0168776	0.0342612	0.0254042	0	0	0	0.0586011	0	0
TNF	0	0.0121359	0	0.00346021	0	0.00501253	0.0540541	0	0.00512821	0	0	0.00297619	0.00711744	0	0.00197628	0.00274725	0.00356506	0.00814664	0.0125	0.00688073	0	0	0	0	0.00421941	0.0171306	0.00461894	0	0	0	0.0170132	0	0
TNFAIP3	0	0.0218447	0.00811359	0.0138408	0	0.0275689	0.108108	0.0108696	0.00769231	0.00988142	0	0.00297619	0.00711744	0	0	0.00549451	0.0124777	0.0183299	0	0.00917431	0.0126582	0.00561798	0.00206612	0.0294118	0	0.0235546	0.0300231	0	0	0.00819672	0.0548204	0.0175439	0
TNFRSF1A	0.0108696	0.00728155	0.0040568	0.0103806	0	0.0225564	0	0.00543478	0.00512821	0.00592885	0	0.0119048	0	0	0.00197628	0.010989	0.00178253	0.0101833	0.0125	0.00229358	0.00632911	0	0.00619835	0.00735294	0.00421941	0.0149893	0.0300231	0	0	0	0.0510397	0	0.0125
TNFRSF1B	0	0.0121359	0.0040568	0.0138408	0	0.0100251	0	0.00543478	0.00769231	0.00592885	0	0	0.00711744	0	0.00197628	0.00274725	0.00534759	0.00203666	0	0.00229358	0.0126582	0	0	0.00735294	0	0.0149893	0.0115473	0	0	0	0.0415879	0	0
TRADD	0	0.00485437	0.0010142	0.00346021	0	0.0075188	0	0	0	0	0	0.00595238	0	0	0.00197628	0	0.00713012	0.00814664	0	0.00229358	0.0126582	0	0	0	0	0.00428266	0.00230947	0	0	0	0.0226843	0.0175439	0
TRAF6	0	0.00728155	0.00608519	0.00692042	0	0.0150376	0	0.00543478	0.00512821	0.00592885	0	0.00595238	0	0	0.00197628	0.00824176	0.0106952	0.01222	0.0125	0.00458716	0	0	0.00206612	0	0.00843882	0.0171306	0.0207852	0	0	0	0.0491493	0.0175439	0
