# Supplementary material for: Role of NF-κB pathway in kidney renal clear cell carcinoma and its potential therapeutic implications
Source: Aging (Albany NY). 2023 Oct 16;15(20):11313–30. doi: 10.18632/aging.205129 (PMC10637793; doi:10.18632/aging.205129)
Supplement: Supplementary Table 2 [file aging-15-205129-s002.xlsx]

## Sheet: Sheet1
Supplementary Table 2. Gene expression of NF-κB family in 32 cancer types. The number 0 indicates that there is no statistical difference.
	BLCA	CHOL	COAD	ESCA	KICH	KIRC	KIRP	LIHC	LUAD	LUSC	PAAD	PCPG	PRAD	READ	SARC	SKCM	STAD	THCA	THYM	UCEC
CHUK	NA	0.842851	NA	NA	-0.773417	-0.75734	-0.411172	0.488169	0.256653	NA	NA	0.636839	NA	NA	NA	NA	0.713229	-0.323203	NA	NA
NFKB1	-0.439076	1.32946	-0.130029	NA	-0.306715	0.241646	NA	NA	NA	-0.453568	NA	-0.953183	-0.151753	NA	NA	NA	0.457612	-0.180484	NA	-0.774958
MAP3K7	NA	1.08705	0.374868	0.488541	-0.459894	NA	0.414625	0.875128	0.374362	0.663689	NA	NA	-0.29675	NA	NA	NA	0.609069	NA	NA	NA
TRADD	0.748298	2.04517	0.225164	0.504677	-0.194604	1.46844	1.15122	0.94826	0.600403	0.30056	NA	-0.636885	0.3259	NA	NA	NA	NA	NA	NA	0.322593
MAP3K1	0.702312	2.86731	NA	NA	-0.951472	-0.435488	0.58079	0.840522	0.387019	NA	NA	NA	-0.57379	NA	NA	NA	0.712016	0.818782	NA	NA
MYD88	0.427203	NA	-0.329593	0.614675	-1.59941	0.484915	0.671185	-0.406761	-0.432831	-0.790565	NA	NA	NA	NA	NA	NA	NA	0.456742	NA	0.675166
TAB1	NA	1.51409	NA	NA	NA	0.336194	0.268836	1.00417	NA	0.278462	NA	-0.899646	NA	NA	NA	NA	NA	-0.118139	NA	NA
MAP3K14	-0.586388	1.5758	-0.288547	NA	-2.37681	1.40018	0.55755	0.42662	-0.514789	-0.651396	NA	NA	-0.500431	NA	NA	NA	NA	NA	NA	-0.786372
TNFRSF1A	NA	NA	-0.703422	0.446828	-0.84482	0.960917	1.01072	-0.196845	NA	NA	NA	-1.58244	-0.144917	NA	NA	NA	NA	0.730621	NA	-0.403476
NFKBIA	-0.650364	0.610164	-0.500939	1.00955	-1.14079	0.731533	NA	NA	-0.834059	-1.35405	-0.608775	-1.65305	-0.26409	-1.04937	NA	NA	-0.30286	-0.786501	NA	-0.538947
IKBKB	NA	1.92777	0.597029	0.559935	-0.518341	0.291225	0.301817	0.763527	0.605278	NA	NA	-0.447319	0.246982	NA	NA	NA	0.53806	-0.263552	-0.491288	-0.309183
TRAF6	-0.202754	0.961478	-0.163907	NA	NA	NA	-0.362763	NA	-0.245588	-0.112578	NA	NA	-0.276949	NA	NA	NA	0.236225	-0.811932	NA	-0.672784
IKBKG	0.395911	0.949932	NA	0.700435	0.217208	0.298354	0.177656	1.50855	NA	0.466154	NA	NA	NA	NA	NA	NA	NA	-0.286863	NA	-0.589894
IL1A	1.43963	5.61984	3.00912	3.04955	1.25131	-0.613257	2.54359	1.21238	-0.828333	NA	NA	NA	-1.8123	NA	NA	NA	-1.14937	-0.777573	NA	1.74606
TNFAIP3	-1.35066	1.81784	-0.11165	1.65678	NA	1.32094	NA	0.492976	-0.906648	-0.737563	-0.961025	NA	-0.545331	NA	NA	NA	0.683371	-0.964826	NA	-0.580584
IL1R1	NA	NA	-0.84186	NA	-1.67997	-0.381318	-0.147202	-0.161258	-0.54658	-1.27628	NA	-2.813	-0.163505	-1.30306	NA	NA	NA	-0.318784	NA	-0.547177
TNFRSF1B	NA	NA	NA	NA	-0.382392	1.42498	0.690051	NA	-0.494116	-1.20796	NA	NA	NA	NA	NA	NA	0.455831	0.530172	NA	-0.787337
RIPK1	NA	0.839985	-0.563403	NA	-0.600765	0.279041	NA	0.452398	NA	-0.376263	NA	NA	NA	-0.501986	NA	NA	NA	-0.260566	-0.432815	-0.330421
FADD	0.990729	1.30125	0.23842	1.84481	-0.549009	0.27405	0.589783	0.955964	0.803129	1.54983	NA	-1.01292	0.135045	0.771757	NA	NA	0.552758	0.377161	NA	NA
TNF	NA	3.03148	NA	2.08494	-1.1984	NA	NA	NA	-0.2458	-0.392977	NA	NA	NA	NA	NA	NA	NA	-0.704893	NA	2.33104
RELA	NA	1.44091	0.198081	0.370569	NA	0.325119	NA	0.619389	0.0713342	NA	NA	-0.403756	0.155698	NA	NA	NA	0.224445	0.239714	NA	NA
